# Supplementary material for: Activation of GPR40 induces hypothalamic neurogenesis through p38- and BDNF-dependent mechanisms
Source: PubMed Central journal article supplement (PMC7338363; doi:10.1038/s41598-020-68110-2), 2020-07-06
Supplement: 41598_2020_68110_MOESM1_ESM.pdf [file 41598_2020_68110_MOESM1_ESM.pdf]

Supplementary File

## **Activation of GPR40 induces hypothalamic neurogenesis through p38- and BDNF-dependent mechanisms**

Daiane F. Engel<sup>1</sup>, Vanessa C. D. Bobbo<sup>1</sup>, Carina S. Solon<sup>1</sup>, Guilherme A. Nogueira<sup>1</sup>, Alexandre Moura-Assis<sup>1</sup>, Natalia F. Mendes<sup>1</sup>, Ariane M. Zanesco<sup>1</sup>, Athanasios Papangelis<sup>2</sup>, Trond Ulven<sup>2</sup>, Licio A. Velloso<sup>1,\*</sup>

**FIGURE S1.** The uncut gel images of phospho-ERK, phospo-Akt, total Akt, phospho-P38 and alpha-tubulin immunocontent.

**SUPPLEMENTARY TABLE 1.** Statistical analysis for all parameters measured using a one-way ANOVA or t-test in the study.

P-ERK

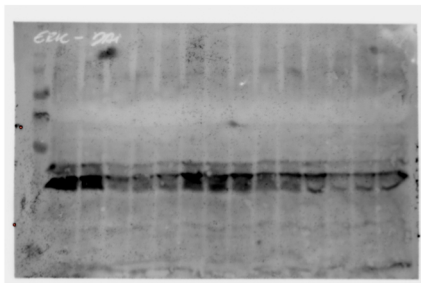

P-Akt

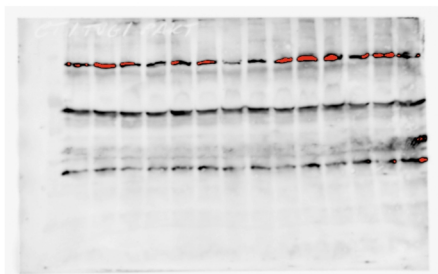

P-P38

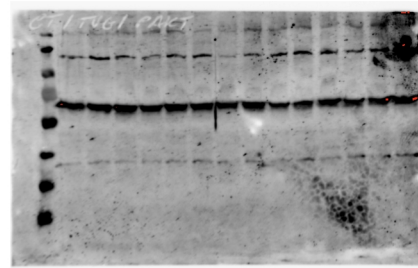

alpha-Tubulin

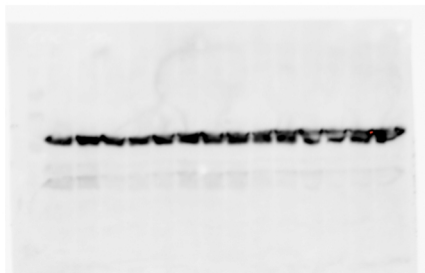

Akt

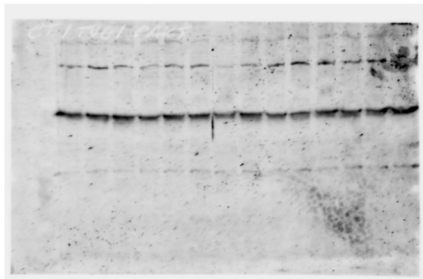

alpha-Tubulin

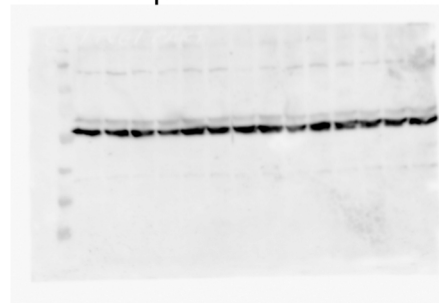

| <b>Figure</b>       | <b>Analysis</b>                                   |
|---------------------|---------------------------------------------------|
| <b>Fig 1C - HVZ</b> | one tailed; $t = 1.98$ , $df = 13$ ; $p = 0.035$  |
| <b>Fig 1C - PA</b>  | one tailed; $t = 1.65$ , $df = 13$ ; $p = 0.06$   |
| <b>Fig 1D - HVZ</b> | one tailed; $t = 2.24$ , $df = 9$ ; $p = 0.026$   |
| <b>Fig 1D - PA</b>  | one tailed; $t = 1.84$ , $df = 9$ ; $p = 0.049$   |
| <b>Fig 1H</b>       | one way ANOVA [F (4, 12) = 60.30; $p < 0.001$     |
| <b>Fig 2C</b>       | one way ANOVA [F (5, 18) = 0.69; $p = 0.64$       |
| <b>Fig 2D</b>       | one way ANOVA [F (5, 18) = 3.16; $p = 0.03$       |
| <b>Fig 2E</b>       | one way ANOVA [F (5, 16) = 11.07; $p < 0.001$     |
| <b>Fig 2F</b>       | one way ANOVA [F (5, 18) = 0.61; $p = 0.70$       |
| <b>Fig 2G</b>       | one way ANOVA [F (5, 18) = 0.56; $p = 0.73$       |
| <b>Fig 2H</b>       | one way ANOVA [F (5, 16) = 0.98; $p = 0.46$       |
| <b>Fig 2I</b>       | one way ANOVA [F (5, 18) = 2.06; $p = 0.12$       |
| <b>Fig 2J</b>       | one way ANOVA [F (5, 18) = 1.15; $p = 0.37$       |
| <b>Fig 2K</b>       | one way ANOVA [F (5, 12) = 7.58; $p = 0.002$      |
| <b>Fig 3B 2h</b>    | Two tailed; $t = 14.30$ , $df = 4$ ; $p < 0.0001$ |
| <b>Fig 3B 4h</b>    | Two tailed; $t = 0.98$ , $df = 3$ ; $p = 0.40$    |
| <b>Fig 3B 8h</b>    | Two tailed; $t = 1.90$ , $df = 3$ ; $p = 0.15$    |
| <b>Fig 3B 24h</b>   | Two tailed; $t = 0.75$ , $df = 4$ ; $p = 0.49$    |
| <b>Fig 3C 2h</b>    | Two tailed; $t = 0.73$ , $df = 4$ ; $p = 0.52$    |
| <b>Fig 3C 4h</b>    | Two tailed; $t = 1.50$ , $df = 4$ ; $p = 0.21$    |
| <b>Fig 3C 8h</b>    | Two tailed; $t = 1.14$ , $df = 4$ ; $p = 0.32$    |
| <b>Fig 3C 24h</b>   | Two tailed; $t = 2.86$ , $df = 4$ ; $p = 0.046$   |
| <b>Fig 3D 2h</b>    | Two tailed; $t = 3.89$ , $df = 6$ ; $p = 0.0081$  |
| <b>Fig 3D 4h</b>    | Two tailed; $t = 5.09$ , $df = 6$ ; $p = 0.0022$  |
| <b>Fig 3D 8h</b>    | Two tailed; $t = 0.63$ , $df = 6$ ; $p = 0.55$    |
| <b>Fig 3D 24h</b>   | Two tailed; $t = 0.41$ , $df = 6$ ; $p = 0.70$    |
| <b>Fig 3E 2h</b>    | Two tailed; $t = 1.13$ , $df = 6$ ; $p = 0.30$    |
| <b>Fig 3E 4h</b>    | Two tailed; $t = 2.64$ , $df = 6$ ; $p = 0.038$   |
| <b>Fig 3E 8h</b>    | Two tailed; $t = 0.25$ , $df = 4$ ; $p = 0.82$    |
| <b>Fig 3E 24h</b>   | Two tailed; $t = 2.66$ , $df = 6$ ; $p = 0.037$   |
| <b>Fig 3F 1h</b>    | Two tailed; $t = 0.69$ , $df = 3$ ; $p = 0.54$    |
| <b>Fig 3F 4h</b>    | Two tailed; $t = 0.30$ , $df = 4$ ; $p = 0.78$    |
| <b>Fig 3G 1h</b>    | Two tailed; $t = 2.58$ , $df = 3$ ; $p = 0.08$    |
| <b>Fig 3G 4h</b>    | Two tailed; $t = 2.06$ , $df = 4$ ; $p = 0.11$    |
| <b>Fig 3H 1h</b>    | Two tailed; $t = 1.10$ , $df = 3$ ; $p = 0.35$    |
| <b>Fig 3H 4h</b>    | Two tailed; $t = 2.59$ , $df = 4$ ; $p = 0.03$    |
| <b>Fig 4B</b>       | one way ANOVA [F (2, 22) = 5.77; $p = 0.0046$     |
| <b>Fig 4C</b>       | one way ANOVA [F (3, 8) = 10.45; $p = 0.0038$     |
| <b>Fig 4D</b>       | one way ANOVA [F (3, 27) = 2.35; $p = 0.09$       |
| <b>Fig 4E</b>       | one way ANOVA [F (3, 28) = 43.17; $p < 0.0001$    |
| <b>Fig 4F</b>       | one way ANOVA [F (3, 28) = 0.28; $p = 0.84$       |
| <b>Fig 4G</b>       | one way ANOVA [F (3, 8) = 7.13; $p = 0.01$        |
| <b>Fig 4I</b>       | one way ANOVA [F (3, 15) = 4.89; $p = 0.014$      |

**Fig 4J**

one way ANOVA [F (3, 14) = 1.40;  $p = 0.28$ ]
